# Supplementary material for: Self-Regulation of Attention in Children in a Virtual Classroom Environment: A Feasibility Study
Source: MDPI journal article supplement (doi:10.3390/bioengineering10121352), 2023-11-24
Supplement: s1 [file s1]

# Self-Regulation of Attention in Children in a Virtual Classroom Environment: A Feasibility Study

## Supplementary Materials:

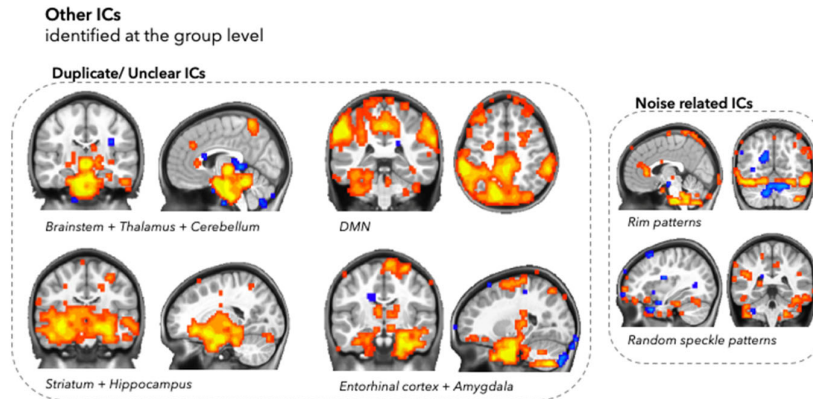

**Figure S1.** Example of other ICs.

**Table S1.** Cluster table.

| Cluster size | x     | y     | z    | Regions                  |
|--------------|-------|-------|------|--------------------------|
| 623          | 9.5   | -83.5 | 55   | R Precuneus              |
| 310          | -8.5  | 45.5  | 13.8 | L Superior Frontal Gyrus |
| 234          | -68.5 | -53.5 | 6.2  | L Middle Temporal Gyrus  |
| 153          | -50.5 | 30.5  | -8.8 | L Inferior Frontal Gyrus |
| 101          | 69.5  | -32.5 | 32.5 | R SupraMarginal Gyrus    |
| 92           | 60.5  | 27.5  | 2.5  | R Inferior Frontal Gyrus |
| 64           | 9.5   | -86.5 | 2.5  | R Calcarine Gyrus        |
| 53           | 54.5  | 27.5  | 36.2 | R Middle Frontal Gyrus   |
